# Supplementary material for: Harvesting of Autogenous Bone Graft from the Ascending Mandibular Ramus Compared with the Chin Region: a Systematic Review and Meta-Analysis Focusing on Complications and Donor Site Morbidity
Source: PubMed Central journal article supplement — J Oral Maxillofac Res. 2020 Nov 30;11(3):e1. doi: 10.5037/jomr.2020.11301 (PMC7644273; doi:10.5037/jomr.2020.11301), 2020-11-30
Supplement: jomr-11-e1-a002.pdf [file jomr-11-e1-a002.pdf]

**Appendix 1.** Search history. Harvesting of Autogenous Bone Graft from the Ascending Mandibular Ramus Compared with the Chin Region: a Systematic Review Focusing on Complications and Donor Site Morbidity

| Database                                    | Interface  | Result     | Date       |
|---------------------------------------------|------------|------------|------------|
| PubMed                                      | PubMed.gov | 149        | 26.06.2020 |
| Embase                                      | Embase.com | 130        | 26.06.2020 |
| Cochrane Library                            | Wiley      | 12         | 26.06.2020 |
| <b>All</b>                                  |            | <b>291</b> |            |
| <b>After duplicate-removal with Endnote</b> |            | <b>225</b> |            |

**Appendix 2.** PubMed search until the 26<sup>th</sup> of June, 2020

| Search | Query                                                                                                                                                                                                                                                                                                                                                                                                                                                                                                                                                                                                                                                                                                                                                                                                                                                                                                                                                                                                                                                                                                                        | Items found               |
|--------|------------------------------------------------------------------------------------------------------------------------------------------------------------------------------------------------------------------------------------------------------------------------------------------------------------------------------------------------------------------------------------------------------------------------------------------------------------------------------------------------------------------------------------------------------------------------------------------------------------------------------------------------------------------------------------------------------------------------------------------------------------------------------------------------------------------------------------------------------------------------------------------------------------------------------------------------------------------------------------------------------------------------------------------------------------------------------------------------------------------------------|---------------------------|
| #33    | Search: ((((((harvest*[Text Word]) AND (bone[Text Word])) OR (“Tissue and Organ Harvesting”[Mesh])) OR (“Bone Transplantation”[Mesh])) AND (((“Mandibular Condyle”[Mesh]) OR (ramus[Text Word])) OR (mandible*[Text Word])) OR (retromolar[Text Word])) AND (((“Chin”[Mesh]) OR (chin[Text Word])) OR (symphy*[Text Word])) OR (parasymphy*[Text Word])) AND (((((((“Controlled Clinical Trial”[Publication Type] OR “Controlled Clinical Trials as Topic”[Mesh])) OR (((random*[Text Word] OR controlled[Text Word] OR crossover[Text Word] OR cross-over[Text Word] OR blind*[Text Word] OR mask*[Text Word])) AND (trial[Text Word] OR trials[Text Word] OR study[Text Word] OR studies[Text Word] OR analys*[Text Word] OR analyz*[Text Word])) OR rct[Text Word]) OR (((singl*[Text Word] OR doubl*[Text Word] OR tripl*[Text Word])) AND (blind[Text Word] OR mask[Text Word])) OR placebo[Text Word]) OR (“Retrospective Studies”[Mesh])) OR (“Prospective Studies”[Mesh])) OR (“Cohort Studies”[Mesh])) OR (retrospective[Text Word] OR prospective[Text Word] OR comparative[Text Word])) Sort by: Publication Date | <a href="#">149</a>       |
| #32    | Search: (((((((“Controlled Clinical Trial”[Publication Type] OR “Controlled Clinical Trials as Topic”[Mesh])) OR (((random*[Text Word] OR controlled[Text Word] OR crossover[Text Word] OR cross-over[Text Word] OR blind*[Text Word] OR mask*[Text Word])) AND (trial[Text Word] OR trials[Text Word] OR study[Text Word] OR studies[Text Word] OR analys*[Text Word] OR analyz*[Text Word])) OR rct[Text Word]) OR (((singl*[Text Word] OR doubl*[Text Word] OR tripl*[Text Word])) AND (blind[Text Word] OR mask[Text Word])) OR placebo[Text Word]) OR (“Retrospective Studies”[Mesh])) OR (“Prospective Studies”[Mesh])) OR (“Cohort Studies”[Mesh])) OR (retrospective[Text Word] OR prospective[Text Word] OR comparative[Text Word]) Sort by: Publication Date                                                                                                                                                                                                                                                                                                                                                       | <a href="#">5,279,419</a> |
| #31    | Search: retrospective[Text Word] OR prospective[Text Word] OR comparative[Text Word] Sort by: Publication Date                                                                                                                                                                                                                                                                                                                                                                                                                                                                                                                                                                                                                                                                                                                                                                                                                                                                                                                                                                                                               | <a href="#">3,529,655</a> |
| #30    | Search: “Cohort Studies”[Mesh]                                                                                                                                                                                                                                                                                                                                                                                                                                                                                                                                                                                                                                                                                                                                                                                                                                                                                                                                                                                                                                                                                               | <a href="#">2,004,579</a> |
| #22    | Search: “Prospective Studies”[Mesh]                                                                                                                                                                                                                                                                                                                                                                                                                                                                                                                                                                                                                                                                                                                                                                                                                                                                                                                                                                                                                                                                                          | <a href="#">541,616</a>   |
| #21    | Search: “Retrospective Studies”[Mesh]                                                                                                                                                                                                                                                                                                                                                                                                                                                                                                                                                                                                                                                                                                                                                                                                                                                                                                                                                                                                                                                                                        | <a href="#">824,772</a>   |
| #19    | Search: (((((((“Controlled Clinical Trial”[Publication Type] OR “Controlled Clinical Trials as Topic”[Mesh])) OR (((random*[Text Word] OR controlled[Text Word] OR crossover[Text Word] OR cross-over[Text Word] OR blind*[Text Word] OR mask*[Text Word])) AND (trial[Text Word] OR trials[Text Word] OR study[Text Word] OR studies[Text Word] OR analys*[Text Word] OR analyz*[Text Word])) OR rct[Text Word]) OR (((singl*[Text Word] OR doubl*[Text Word] OR tripl*[Text Word])) AND (blind[Text Word] OR mask[Text Word])) OR placebo[Text Word]) Sort by: Publication Date                                                                                                                                                                                                                                                                                                                                                                                                                                                                                                                                            | <a href="#">1,790,170</a> |
| #15    | Search: ((((((harvest*[Text Word]) AND (bone[Text Word])) OR (“Tissue and Organ Harvesting”[Mesh])) OR (“Bone Transplantation”[Mesh])) AND (((“Mandibular Condyle”[Mesh]) OR (ramus[Text Word])) OR (mandible*[Text Word])) OR (retromolar[Text Word])) AND (((“Chin”[Mesh]) OR (chin[Text Word])) OR (symphy*[Text Word])) OR (parasymphy*[Text Word])) Sort by: Publication Date                                                                                                                                                                                                                                                                                                                                                                                                                                                                                                                                                                                                                                                                                                                                           | <a href="#">334</a>       |
| #14    | Search: (((“Chin”[Mesh]) OR (chin[Text Word])) OR (symphy*[Text Word])) OR (parasymphy*[Text Word]) Sort by: Publication Date                                                                                                                                                                                                                                                                                                                                                                                                                                                                                                                                                                                                                                                                                                                                                                                                                                                                                                                                                                                                | <a href="#">15,556</a>    |
| #13    | Search: parasymphy*[Text Word] Sort by: Publication Date                                                                                                                                                                                                                                                                                                                                                                                                                                                                                                                                                                                                                                                                                                                                                                                                                                                                                                                                                                                                                                                                     | <a href="#">361</a>       |
| #12    | Search: symphy*[Text Word] Sort by: Publication Date                                                                                                                                                                                                                                                                                                                                                                                                                                                                                                                                                                                                                                                                                                                                                                                                                                                                                                                                                                                                                                                                         | <a href="#">6,377</a>     |
| #11    | Search: chin[Text Word] Sort by: Publication Date                                                                                                                                                                                                                                                                                                                                                                                                                                                                                                                                                                                                                                                                                                                                                                                                                                                                                                                                                                                                                                                                            | <a href="#">9,245</a>     |
| #10    | Search: “Chin”[Mesh]                                                                                                                                                                                                                                                                                                                                                                                                                                                                                                                                                                                                                                                                                                                                                                                                                                                                                                                                                                                                                                                                                                         | <a href="#">3,846</a>     |
| #9     | Search: (((“Mandibular Condyle”[Mesh]) OR (ramus[Text Word])) OR (mandible*[Text Word])) OR (retromolar[Text Word]) Sort by: Publication Date                                                                                                                                                                                                                                                                                                                                                                                                                                                                                                                                                                                                                                                                                                                                                                                                                                                                                                                                                                                | <a href="#">78,774</a>    |
| #8     | Search: retromolar[Text Word] Sort by: Publication Date                                                                                                                                                                                                                                                                                                                                                                                                                                                                                                                                                                                                                                                                                                                                                                                                                                                                                                                                                                                                                                                                      | <a href="#">959</a>       |
| #7     | Search: mandible*[Text Word] Sort by: Publication Date                                                                                                                                                                                                                                                                                                                                                                                                                                                                                                                                                                                                                                                                                                                                                                                                                                                                                                                                                                                                                                                                       | <a href="#">69,426</a>    |
| #6     | Search: ramus[Text Word] Sort by: Publication Date                                                                                                                                                                                                                                                                                                                                                                                                                                                                                                                                                                                                                                                                                                                                                                                                                                                                                                                                                                                                                                                                           | <a href="#">6,693</a>     |
| #5     | Search: “Mandibular Condyle”[Mesh]                                                                                                                                                                                                                                                                                                                                                                                                                                                                                                                                                                                                                                                                                                                                                                                                                                                                                                                                                                                                                                                                                           | <a href="#">8,978</a>     |
| #4     | Search: (((harvest*[Text Word]) AND (bone[Text Word])) OR (“Tissue and Organ Harvesting”[Mesh])) OR (“Bone Transplantation”[Mesh]) Sort by: Publication Date                                                                                                                                                                                                                                                                                                                                                                                                                                                                                                                                                                                                                                                                                                                                                                                                                                                                                                                                                                 | <a href="#">57,601</a>    |
| #3     | Search: “Bone Transplantation”[Mesh]                                                                                                                                                                                                                                                                                                                                                                                                                                                                                                                                                                                                                                                                                                                                                                                                                                                                                                                                                                                                                                                                                         | <a href="#">31,647</a>    |
| #2     | Search: “Tissue and Organ Harvesting”[Mesh]                                                                                                                                                                                                                                                                                                                                                                                                                                                                                                                                                                                                                                                                                                                                                                                                                                                                                                                                                                                                                                                                                  | <a href="#">17,188</a>    |
| #1     | Search: (harvest*[Text Word]) AND (bone[Text Word]) Sort by: Publication Date                                                                                                                                                                                                                                                                                                                                                                                                                                                                                                                                                                                                                                                                                                                                                                                                                                                                                                                                                                                                                                                | <a href="#">13,021</a>    |
