# Supplementary material for: Harvesting of Autogenous Bone Graft from the Ascending Mandibular Ramus Compared with the Chin Region: a Systematic Review and Meta-Analysis Focusing on Complications and Donor Site Morbidity
Source: PubMed Central journal article supplement — J Oral Maxillofac Res. 2020 Nov 30;11(3):e1. doi: 10.5037/jomr.2020.11301 (PMC7644273; doi:10.5037/jomr.2020.11301), 2020-11-30
Supplement: jomr-11-e1-a004.pdf [file jomr-11-e1-a004.pdf]

**Appendix 3.** Embase search until the 26<sup>th</sup> of June, 2020

| No. | Query                                                                                                                                              | Results  |
|-----|----------------------------------------------------------------------------------------------------------------------------------------------------|----------|
| #25 | #15 AND #24                                                                                                                                        | 130      |
| #24 | #16 OR #17 OR #18 OR #19 OR #20 OR #21 OR #22 OR #23                                                                                               | 11091376 |
| #23 | 'follow up'/de                                                                                                                                     | 1559669  |
| #22 | retrospective OR prospective OR comparative                                                                                                        | 3460089  |
| #21 | 'retrospective study'/de                                                                                                                           | 926404   |
| #20 | 'prospective study'/de                                                                                                                             | 606196   |
| #19 | ((single OR double OR triple) NEAR/2 (blind* OR mask*)):ti,ab,de) OR placebo:ti,ab,de                                                              | 591590   |
| #18 | ((random* OR controlled* OR crossover OR 'cross over' OR blind* OR mask*) NEAR/3 (trial* OR study OR studies OR analy*)):ti,ab,de) OR rct:ti,ab,de | 8040542  |
| #17 | 'randomized controlled trial'/exp                                                                                                                  | 607158   |
| #16 | 'controlled clinical trial'/exp                                                                                                                    | 778051   |
| #15 | #3 AND #9 AND #14                                                                                                                                  | 282      |
| #14 | #10 OR #11 OR #12 OR #13                                                                                                                           | 283739   |
| #13 | parasympy*                                                                                                                                         | 386      |
| #12 | symphy*                                                                                                                                            | 8789     |
| #11 | chin                                                                                                                                               | 275042   |
| #10 | 'chin'/de                                                                                                                                          | 5386     |
| #9  | #4 OR #5 OR #6 OR #7 OR #8                                                                                                                         | 99831    |
| #8  | retromolar                                                                                                                                         | 1195     |
| #7  | mandible*                                                                                                                                          | 92507    |
| #6  | 'mandible condyle'/de                                                                                                                              | 8721     |
| #5  | ramus                                                                                                                                              | 8232     |
| #4  | 'mandibular nerve'/de                                                                                                                              | 4407     |
| #3  | #1 OR #2                                                                                                                                           | 38487    |
| #2  | 'bone graft'/exp                                                                                                                                   | 34613    |
| #1  | harvest* NEAR/4 bone                                                                                                                               | 5280     |

**Appendix 4.** Cochrane Library search until the 26<sup>th</sup> of June, 2020

| ID  | Search                                                           | Hits |
|-----|------------------------------------------------------------------|------|
| #1  | (harvest* NEAR/4 bone):ti,ab,kw                                  | 403  |
| #2  | MeSH descriptor: [Tissue and Organ Harvesting] explode all trees | 665  |
| #3  | MeSH descriptor: [Bone Transplantation] explode all trees        | 935  |
| #4  | {OR #1-#3}                                                       | 1848 |
| #5  | MeSH descriptor: [Mandibular Condyle] explode all trees          | 99   |
| #6  | (ramus):ti,ab,kw                                                 | 316  |
| #7  | (mandible*):ti,ab,kw                                             | 3133 |
| #8  | (retromolar):ti,ab,kw                                            | 47   |
| #9  | {OR #5-#8}                                                       | 3408 |
| #10 | MeSH descriptor: [Chin] explode all trees                        | 87   |
| #11 | (chin):ti,ab,kw                                                  | 1104 |
| #12 | (symphy* OR parasympy*):ti,ab,kw                                 | 272  |
| #13 | {OR #10-#12}                                                     | 1365 |
| #14 | #4 and #9 and #13                                                | 12   |
